# Supplementary material for: In situ bifunctionalized carbon dots with boronic acid and amino groups for ultrasensitive dopamine detection
Source: Royal Society of Chemistry journal article supplement (doi:10.1039/c6ay00142d), 2016-01-01
Supplement: c6ay00142d1.pdf [file c6ay00142d1.pdf]

***In-situ bifunctionalized carbon dots with boronic acid and amino groups for ultrasensitive dopamine detection***

Electronic Supplementary Information (ESI)

1. UV-vis absorption and FL spectra of B-CDs  
Fig. S1
2. FT-IR spectra of N-CDs  
Fig. S2
3. UV-vis absorption and FL spectra of N-CDs  
Fig. S3
4. UV-vis absorption and FL spectra of m-CDs  
Fig. S4
5. FL emission spectra of m-CDs in the absence and presence of 1  $\mu$ M DA.  
Fig. S5
6. The overlap of UV-vis absorption of QY measurement of B-N-CDs and FL emission of DA  
Fig. S6

1. UV-vis absorption and FL spectra of B-CDs

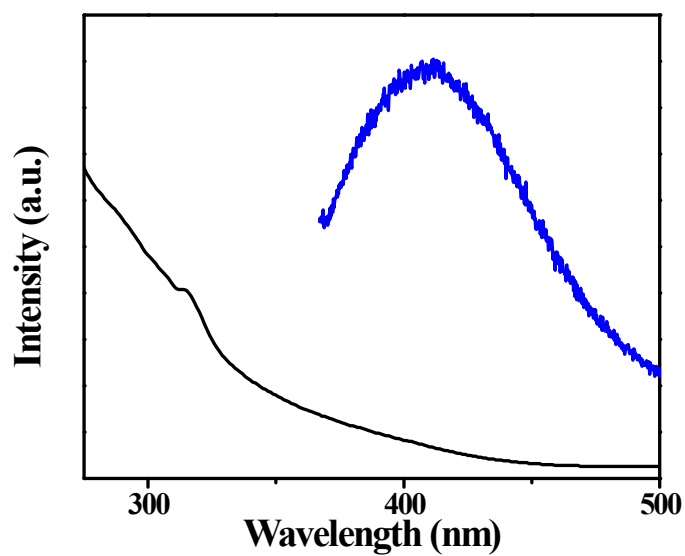

Fig. S1 UV-vis absorption (black line) and fluorescence emission spectra (blue line) of B-CDs.

## 2. FT-IR spectra of N-CDs

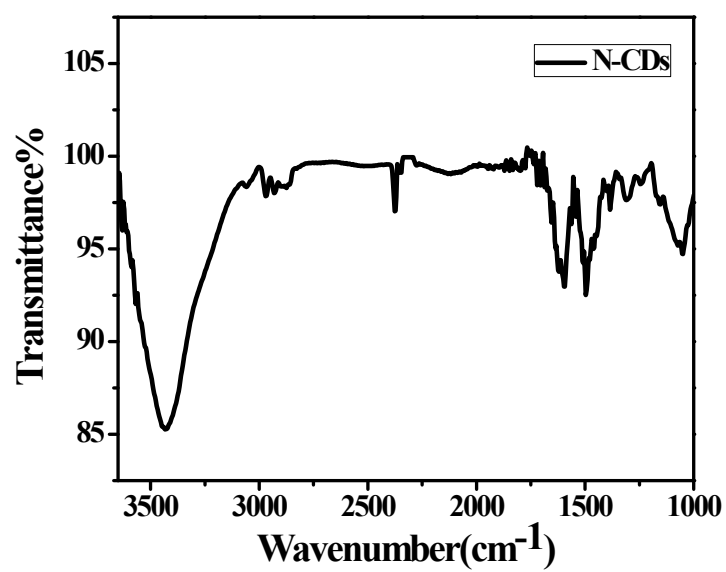

Fig. S2 FT-IR spectra of N-CDs

## 3. UV-vis absorption and FL spectra of N-CDs

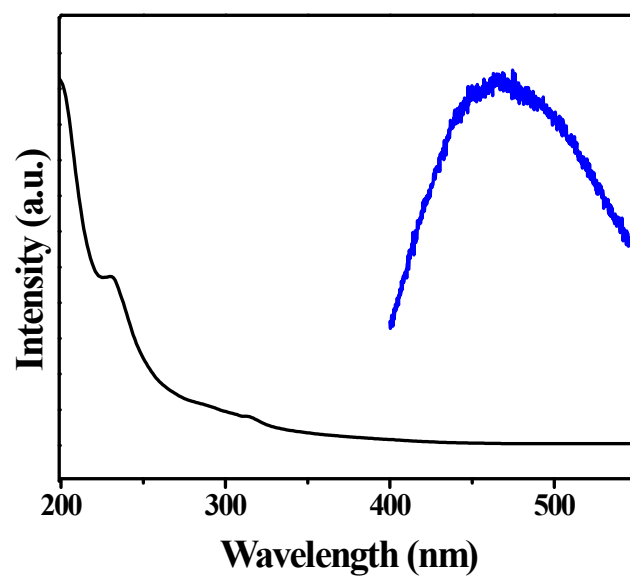

Fig. S3 UV-vis absorption (black line) and fluorescence emission spectra (blue line) of N-CDs.

4. UV-vis absorption and FL spectra of m-CDs

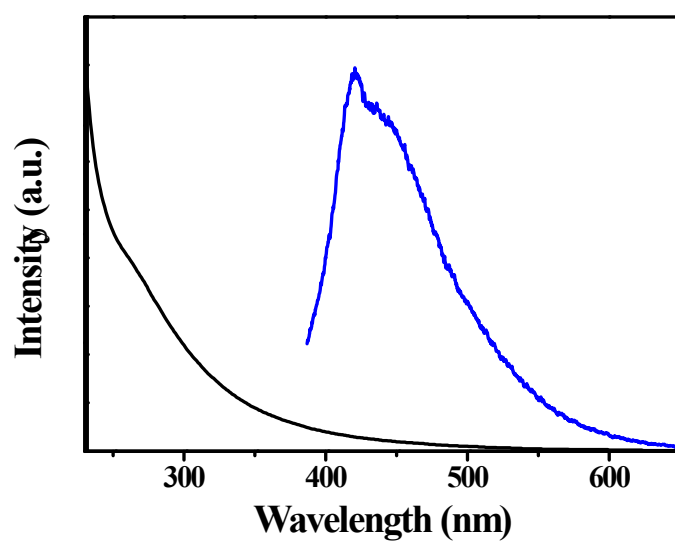

Fig. S4 UV-vis absorption (black line) and fluorescence emission spectra (blue line) of m-CDs.

5. FL emission spectra of m-CDs in the absence and presence of 1  $\mu$ M DA.

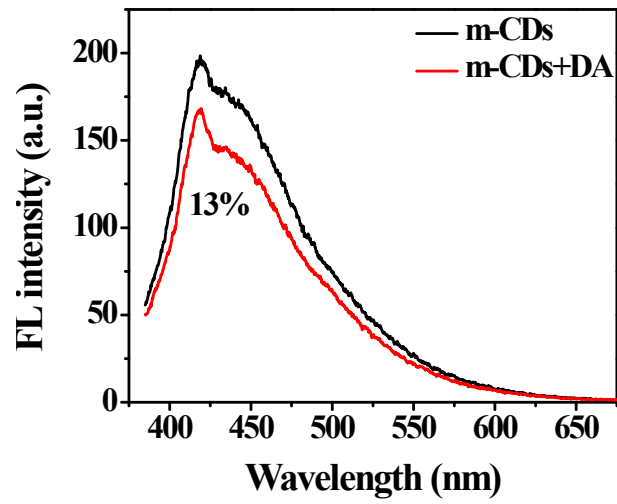

Fig. S5 FL emission spectra of m-CDs in the absence and presence of 1  $\mu$ M DA

6. The overlap between UV-vis absorption of QY measurement of B-N-CDs and fluorescence emission of DA

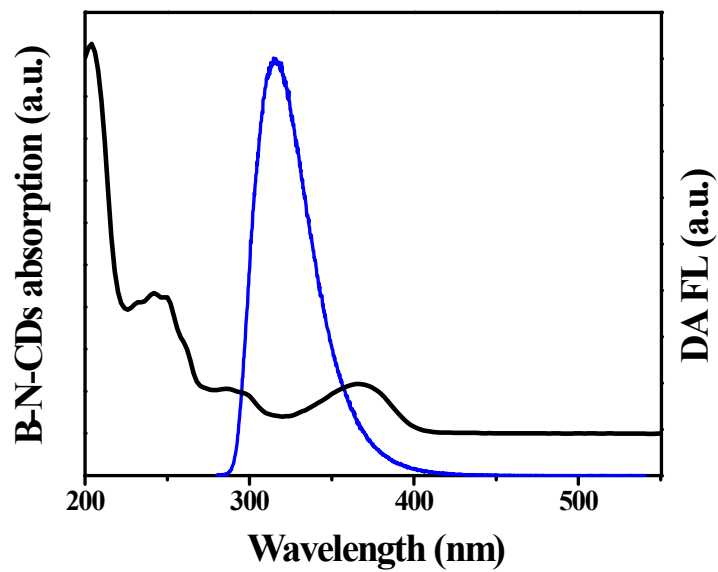

Fig. S6 UV-vis absorption of B-N-CDs (black line) and FL emission of DA (blue line ).
